# Supplementary material
Source: PubMed Central journal article supplement (PMC6993919)
Supplement: NIHMS1041010-supplement-1.pdf [file NIHMS1041010-supplement-1.pdf]

## ONLINE REPOSITORY

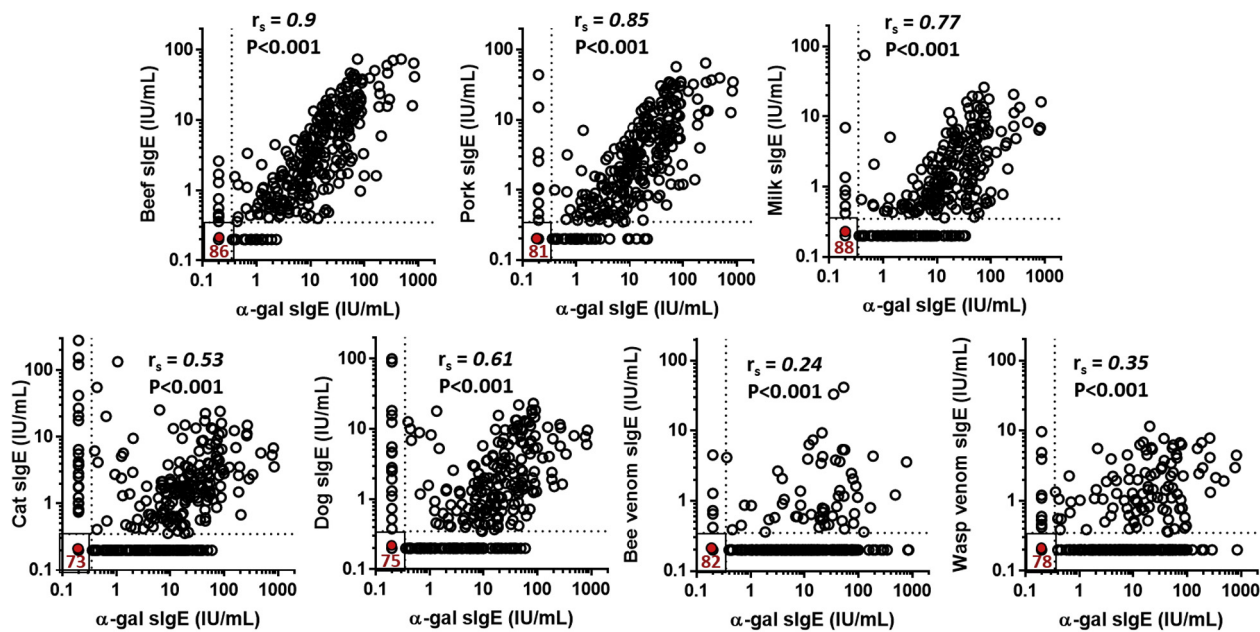

**FIGURE E1.** Correlation plots of galactose- $\alpha$ -1,3-galactose ( $\alpha$ -Gal) specific IgE (sIgE) versus sIgE to mammalian and venom extracts from the whole cohort ( $n = 408$ ). Shown are Spearman's rank values ( $r_s$ ) with  $P$  value. The red circle and accompanying number (underneath) in red text represents the number of sera that had levels  $< 0.35$  IU/mL to both allergens.

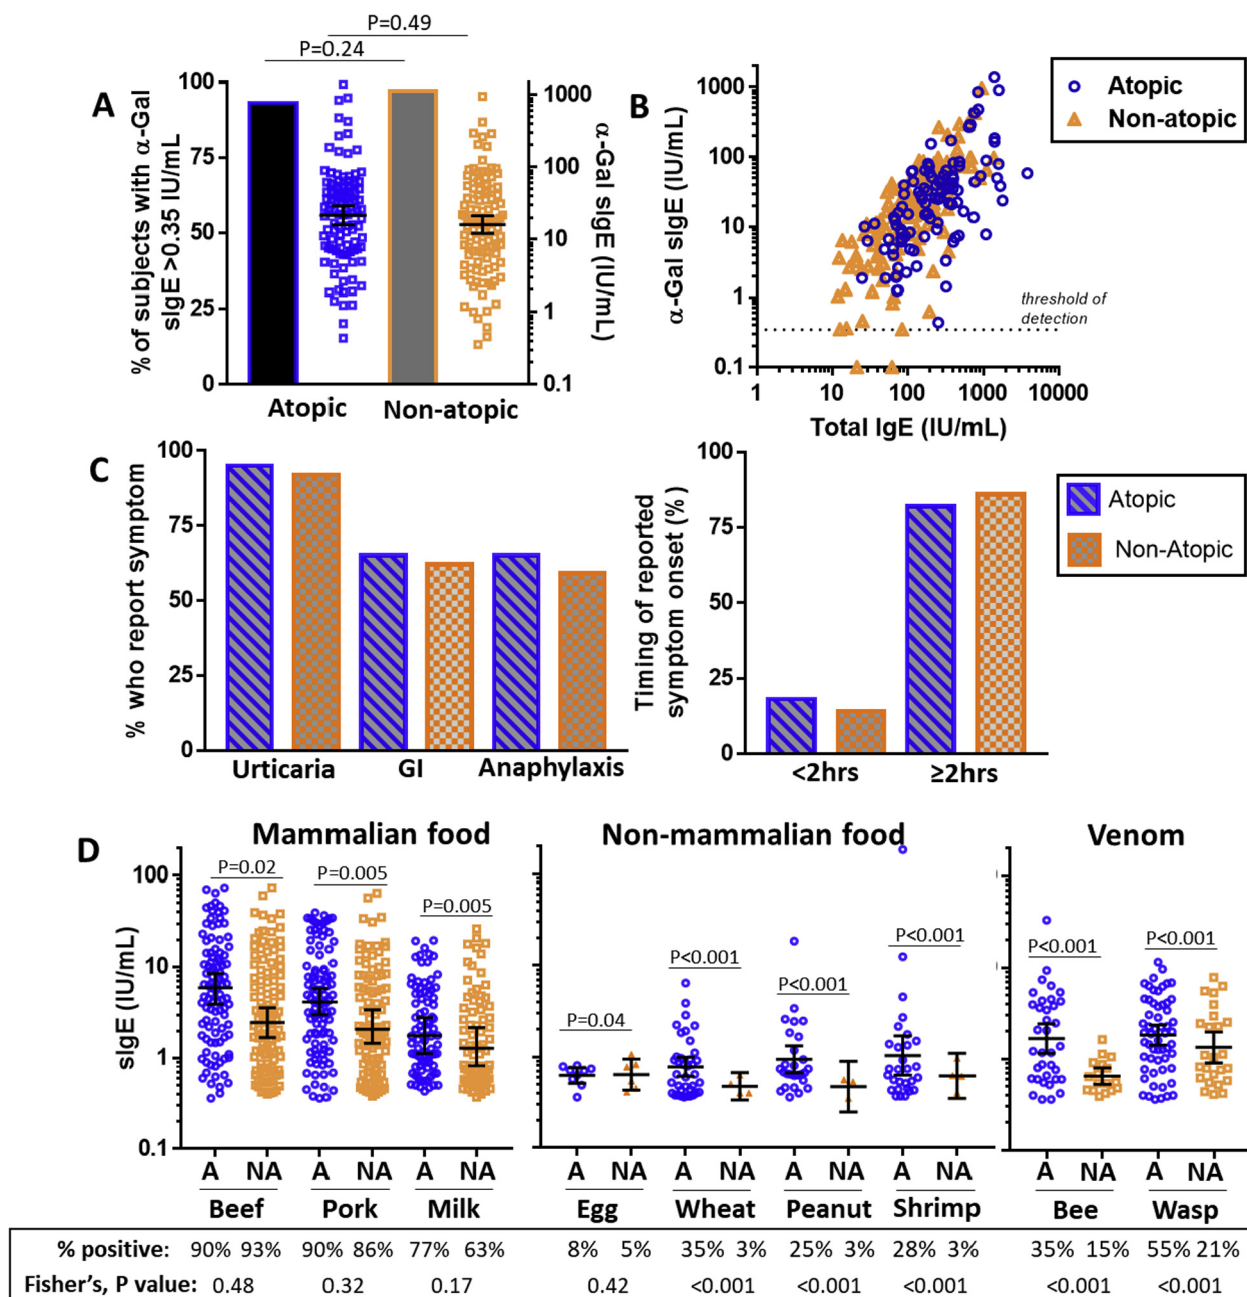

**FIGURE E2.** Relationship between characteristics of galactose- $\alpha$ -1,3-galactose ( $\alpha$ -Gal) syndrome and atopy among subjects reporting reactions to red meat. **A**, Prevalence (bar graph, left y-axis) and titers (scatter plot, right y-axis) of specific IgE (sIgE) to  $\alpha$ -Gal in atopics and nonatopics (atopy defined as sIgE  $\geq$  0.35 IU/mL to dust mite, Timothy grass ragweed, birch, cockroach, and/or *Alternaria*) where A denotes atopic and NA denotes nonatopic. **B**, Correlation of  $\alpha$ -Gal sIgE and total IgE in atopic ( $n = 111$ ) and nonatopic subjects ( $n = 118$ ) who reported allergic reactions to mammalian meat. **C**, Symptoms reported by red meat allergic subjects in relation to atopy status. **D**, Prevalence (shown in table format under the graph) and titers of sIgE to mammalian and nonmammalian foods, and venom, among atopic and nonatopic subjects reporting reactions to red meat. Data expressed as geometric mean with 95% confidence interval; levels of detected sIgE compared by the Mann-Whitney  $U$  test and prevalence compared by Fisher's exact test. *GI*, Gastrointestinal.

**TABLE E1.** Characteristics of subjects who reported mammalian meat allergy stratified according to timing of symptom onset

| Demographics, clinical, and immunologic characteristics | Self-reported allergy to mammalian meat* |                    | P value |
|---------------------------------------------------------|------------------------------------------|--------------------|---------|
|                                                         | Symptom onset 0 to <2 h                  | Symptom onset ≥2 h |         |
| n                                                       | 41                                       | 217                | na      |
| Age at enrollment, y, mean (range)                      | 47.2 (10-81)                             | 45.7 (5-82)        | .62**   |
| Age at onset of urticaria or anaphylaxis†               |                                          |                    |         |
| Mean                                                    | 41.9 (35.7-48.2)                         | 41.0 (38.6-43.5)   | .78**   |
| ≤21, n (%)                                              | 8 (20%)                                  | 41 (19%)           | .93††   |
| 22-40, n (%)                                            | 10 (24%)                                 | 52 (24%)           | .95††   |
| >40, n (%)                                              | 23 (56%)                                 | 124 (57%)          | .90††   |
| Sex, male                                               | 13 (32%)                                 | 106 (48%)          | .04††   |
| Race                                                    |                                          |                    |         |
| Caucasian                                               | 40 (98%)                                 | 204 (94%)          | .36††   |
| African American                                        | 1 (2%)                                   | 4 (2%)             | .62††   |
| Other                                                   | 0                                        | 9 (4%)             | .18††   |
| Physician diagnosis of asthma                           | 8/41 (20%)                               | 35/215 (16%)       | .61††   |
| Seasonal or perennial rhinitis                          | 28/41 (68%)                              | 142/214 (66%)      | .81††   |
| Urgent care for hives or anaphylaxis?                   | 29 (71%)                                 | 135 (62%)          | .30††   |
| Total IgE, GM, IU/mL (95% CI)                           | 128 (91-182)                             | 147 (126-171)      | .58     |
| α-Gal sIgE                                              |                                          |                    |         |
| Prevalence, n (%)                                       | 35 (85%)                                 | 207 (95%)          | .02††   |
| GM, IU/mL (95% CI)‡                                     | 15.9 (10-25)                             | 18.2 (15-23)       | .69‡‡   |
| Beef sIgE                                               |                                          |                    |         |
| Prevalence, n (%)                                       | 31/35 (89%)                              | 181/192 (94%)      | .21††   |
| GM, IU/mL (95% CI)‡                                     | 3.8 (2.2-6.4)                            | 5.0 (4.1-6.1)      | .28‡‡   |
| §Inhalant sIgE, prevalence, n (%)                       | 18/35 (51%)                              | 80/191 (42%)       | .29††   |
| ¶Food sIgE, prevalence, n (%)                           | 10/33 (30%)                              | 56/187 (30%)       | .97††   |
| #Venom sIgE, prevalence, n (%)                          | 12/33 (36%)                              | 80/186 (43%)       | .48††   |

α-Gal, Galactose-α-1,3-galactose; CI, confidence interval; na, not applicable; sIgE, specific IgE.

\*3 subjects who did not report a specific time of symptom onset were excluded from this analysis.

†Of those who had urticaria or anaphylaxis and identified a distinct time of onset.

‡Geometric mean (GM) calculated for positive values.

§IgE to dust mite, timothy, or ragweed ≥0.35 IU/mL.

¶IgE to egg, wheat, peanut, or shrimp ≥0.35 IU/mL.

#IgE to bee or wasp venom ≥0.35 IU/mL.

\*\*Unpaired Student's *t*-test.

††χ<sup>2</sup> test.

‡‡Mann-Whitney *U* test.

**TABLE E2.** Clinical characteristics of a cohort of 408 subjects, based on  $\alpha$ -Gal sIgE status

| Demographics and clinical characteristics          | $\alpha$ -Gal < 0.35 | $\alpha$ -Gal $\geq$ 0.35 | P value                      |
|----------------------------------------------------|----------------------|---------------------------|------------------------------|
| N                                                  | 97                   | 311                       | —                            |
| Age at enrollment, y, mean (range)                 | 46.7 (12-78)         | 45.9 (5-82)               | .74 <sup>†</sup>             |
| Age at onset of urticaria or anaphylaxis*          |                      |                           |                              |
| mean (range)                                       | 32.0 (1-61)          | 41.0 (1-81)               | <b>.003</b> <sup>†</sup>     |
| $\leq$ 21, n (%)                                   | 14/44 (32%)          | 61/302 (20%)              | .12 <sup>‡</sup>             |
| 22-40, n (%)                                       | 15/44 (34%)          | 68/302 (23%)              | .13 <sup>‡</sup>             |
| >40, n (%)                                         | 15/44 (34%)          | 173/302 (57%)             | <b>.006</b> <sup>‡</sup>     |
| Gender, male                                       | 27 (28%)             | 145 (47%)                 | <b>.001</b> <sup>‡</sup>     |
| Race                                               |                      |                           |                              |
| Caucasian                                          | 84 (87%)             | 291 (94%)                 | <b>.04</b> <sup>‡</sup>      |
| African American                                   | 7 (7%)               | 10 (3%)                   | .09 <sup>‡</sup>             |
| Other                                              | 6 (6%)               | 10 (3%)                   | .23 <sup>‡</sup>             |
| Physician diagnosis of asthma                      | 50/96 (52%)          | 62/307 (20%)              | <b>&lt;.001</b> <sup>‡</sup> |
| Seasonal or perennial rhinitis                     | 74/97 (76%)          | 210/308 (68%)             | .16 <sup>†</sup>             |
| Hives ever                                         | 64/97 (66%)          | 293/311 (94%)             | <b>&lt;.001</b> <sup>‡</sup> |
| Anaphylaxis ever                                   | 36/97 (37%)          | 213/311 (68%)             | <b>&lt;.001</b> <sup>‡</sup> |
| Hives or anaphylaxis requiring urgent care         | 33/97 (34%)          | 191/310 (62%)             | <b>&lt;.001</b> <sup>‡</sup> |
| Presentation to ED related to hives or anaphylaxis | 28/97 (29%)          | 168/310 (54%)             | <b>&lt;.001</b> <sup>‡</sup> |

$\alpha$ -Gal, Galactose- $\alpha$ -1,3-galactose; ED, emergency department; sIgE, specific IgE.

Bold indicates statistical significance ( $P < .05$ ).

\*For those who reported urticaria or anaphylaxis.

<sup>†</sup>Unpaired Student's *t* test.

<sup>‡</sup>Fisher's exact test.

**TABLE E3.** (A) ABO prevalence in current cohort as compared to the USA.\* (B) ABO blood group distribution as relates to the presence or absence of detectable  $\alpha$ -Gal sIgE, or to subjects with mammalian meat allergy<sup>†</sup> as determined by reverse typing and self-report, or (C) reverse typing alone

| <b>(A) ABO prevalence in current cohort</b> |             |                                      |                                       |                                  |       |            |  |
|---------------------------------------------|-------------|--------------------------------------|---------------------------------------|----------------------------------|-------|------------|--|
| ABO                                         | Total       |                                      | White                                 |                                  | Black |            |  |
|                                             | USA         | UVA cohort                           | USA                                   | UVA cohort                       | USA   | UVA cohort |  |
| A, %                                        | 37.1%       | 41.5%                                | 39.7%                                 | 42.6%                            | 25.8% | 33.3%      |  |
| B, %                                        | 12.2%       | 7.0%                                 | 10.9%                                 | 6.5%                             | 19.7% | 16.7%      |  |
| O, %                                        | 46.6%       | 48.2%                                | 45.2%                                 | 47.3%                            | 50.2% | 50%        |  |
| AB, %                                       | 4.1%        | 3.3%                                 | 4.1%                                  | 3.6%                             | 4.3%  | 0%         |  |
| B or AB, %                                  | 16.3%       | 10.3%                                | 16.3%                                 | 10.1%                            | 24.0% | 16.7%      |  |
| <b>(B) ABO blood group distribution</b>     |             |                                      |                                       |                                  |       |            |  |
| ABO group                                   | USA average | $\alpha$ -Gal sIgE negative (n = 77) | $\alpha$ -Gal sIgE positive (n = 222) | Mammalian meat allergy (n = 174) |       |            |  |
| A                                           | 37.1%       | 30 (39.0%)                           | 94 (42.3%)                            | 76 (43.7%)                       |       |            |  |
| O                                           | 46.6%       | 36 (46.8%)                           | 108 (48.6%)                           | 84 (48.3%)                       |       |            |  |
| B or AB                                     | 16.3%       | 11 (14.3%)                           | 20 (9.0%)                             | 14 (8.0%)                        |       |            |  |
| <b>(C) Reverse typing alone</b>             |             |                                      |                                       |                                  |       |            |  |
| ABO group                                   | USA average | $\alpha$ -Gal sIgE negative (n = 59) | $\alpha$ -Gal sIgE positive (n = 133) | Mammalian meat allergy (n = 96)  |       |            |  |
| A                                           | 37.1%       | 21 (35.6%)                           | 53 (39.8%)                            | 39 (40.6%)                       |       |            |  |
| O                                           | 46.6%       | 29 (49.2%)                           | 65 (48.9%)                            | 48 (50.0%)                       |       |            |  |
| B or AB                                     | 16.3%       | 9 (15.3%)                            | 15 (11.3%)                            | 9 (9.4%)                         |       |            |  |

$\alpha$ -Gal, Galactose- $\alpha$ -1,3-galactose; sIgE, specific IgE.

\*Data on USA prevalence from Garratty G, Glynn SA, McEntire R; Retrovirus Epidemiology Donor Study. ABO and Rh(D) phenotype frequencies of different racial/ethnic groups in the United States. Transfusion 2004;44:703-6

<sup>†</sup>As defined by history of reactions to mammalian meat and positive  $\alpha$ -Gal sIgE.
